# Supplementary material for: Amino Acids Supplementation for the Milk and Milk Protein Production of Dairy Cows
Source: MDPI journal article supplement (doi:10.3390/ani11072118), 2021-07-16
Supplement: s1 [file s1]

Supplemental Table S1. Summarized productive results according to various feeding methods as described in section 3.

| Methods              | Feeding methods                             |                             | Outcome            |                                   |       | Reference |
|----------------------|---------------------------------------------|-----------------------------|--------------------|-----------------------------------|-------|-----------|
|                      | Treatment <sup>1</sup>                      | Dietary CP <sup>2</sup> (%) | Milk yield (kg/d)  | Milk protein (g/d)                | yield |           |
| Diet                 | Soybean meal                                | 15.3                        |                    |                                   |       | [3]       |
|                      | To meet 17.3% of dietary CP                 |                             | +0.9               | +19                               |       |           |
|                      | To meet 19.0% of dietary CP                 |                             | +1.4               | +29                               |       |           |
|                      | To meet 21.0% of dietary CP                 |                             | +1.4               | +26                               |       |           |
| Diet                 | Soybean meal (to meet 15.4% of dietary CP)  | 11.3                        | +1.4               | +48                               |       | [4]       |
| Diet                 | Soybean meal (to be isonitrogenous)         | 17.1                        | +3.0               | +113                              |       | [5]       |
| Diet                 | Soybean meal vs. canola meal                | 14.7 or 16.6                | +1.0 (canola meal) | +30 (canola meal)                 |       | [12]      |
|                      |                                             |                             |                    | (milk true protein)               |       |           |
| Diet                 | Feather meal (12.6% inclusion in diet)      | 19.2                        | -7.4               | -331                              |       | [16]      |
| Duodenal infusion    | Calcium caseinate (743 g/d/cow)             | 14.1                        | +1.0 (kg/12 h)     | +36 (g/12 h)                      |       | [7]       |
|                      |                                             |                             |                    | (milk true protein <sup>3</sup> ) |       |           |
| Abomasal infusion    | Sodium caseinate                            | 15.6                        | -                  | -                                 |       | [8]       |
|                      | (To meet 15% of metabolizable protein)      |                             |                    |                                   |       |           |
| Abomasal infusion    | Amino acids mixture (ratio of milk protein) | 9.3                         |                    |                                   |       | [15]      |
|                      | Deletion of Met                             |                             | -                  | -                                 |       |           |
|                      | Deletion of Lys                             |                             | -                  | -                                 |       |           |
|                      | Deletion of His                             |                             | -                  | -                                 |       |           |
| Abomasal infusion    | His (6.5 g/d/cow)                           | 14.2                        | +0.7               | +26                               |       | [22]      |
| Abomasal infusion    | BCAA (150 g/d/cow)                          | 16.2                        | -                  | -                                 |       | [26]      |
| Abomasal infusion    | His (6.5 g/d/cow)                           | 14.6                        | +0.8               | +24                               |       | [28]      |
| Intravenous infusion | Met                                         | No data                     |                    |                                   |       | [23]      |
|                      | 11.2 g/d/cow                                |                             | -                  | +30                               |       |           |
|                      | 24.8 g/d/cow                                |                             | -                  | -                                 |       |           |
|                      | Lys                                         |                             |                    |                                   |       |           |
|                      | 33.5 g/d/cow                                |                             | -                  | -                                 |       |           |
|                      | 65.9 g/d/cow                                |                             | -                  | -                                 |       |           |
|                      | His                                         |                             |                    |                                   |       |           |
|                      | 21.2 g/d/cow                                |                             | -                  | -                                 |       |           |

|                      |                                              |                |       |                         |      |
|----------------------|----------------------------------------------|----------------|-------|-------------------------|------|
|                      | 50.3 g/d/cow                                 |                | -     | -                       |      |
| Intravenous infusion | Mixture of Met, Lys, His, and Trp            | No data        |       |                         | [19] |
|                      | Deletion of His                              |                | -3.2  | -159                    |      |
| Intravenous infusion | Amino acids mixture (ratio of casein)        | No data        | +2.9  | +107                    | [20] |
|                      | Met, Lys, His (7.1, 17.6, 6.0 g/d/cow)       |                | +2.4  | +108                    |      |
|                      | His (6.0 g/d/cow)                            |                | +2.3  | +60                     |      |
| Intravenous infusion | Met, Lys                                     | 16.1           | -     | +130                    | [29] |
|                      | Met, Lys, BCAA                               |                | -     | +129                    |      |
| Intravenous infusion | Ile, Leu                                     | 15.2           | +2.2  | +40                     | [30] |
| RPAA <sup>4</sup>    | RP-Met (0.03% of diets)                      | 14.5           | -     | -                       | [32] |
| RPAA                 | RP-Lys (94.4 g/d/cow)                        | 17.0           | +2.03 | +80                     | [33] |
| RPAA                 | RP-Lys (60 g/d/cow)                          | 16.4           | -     | -                       | [34] |
| RPAA                 | RP-Met (5.25 g/d/cow)                        | 19.5           | -     | +28                     | [35] |
|                      | RP-Met (10.5 g/d/cow)                        |                | -     | +42                     |      |
|                      | RP-Met, RP-Lys (11.5, 14.7 g/d/cow)          |                | -     | +59                     |      |
| RPAA                 | RP-Met (40 g/d/cow)                          | 16.0           | -     | -                       | [36] |
|                      |                                              | 18.5           | -     | -                       |      |
| RPAA                 | RP-Met (18.2 g/d/cow)                        | 14.5           | -     | -                       | [37] |
| (tablet form)        | RP-Lys (11.7 g/d/cow)                        |                | -     | -                       |      |
|                      | RP-Met, RP-Lys (18.2, 11.7 g/d/cow)          |                | -     | +64                     |      |
| RPAA                 | RP-His                                       | 15.1           |       |                         | [39] |
|                      | 82 g/d/cow                                   | (containing 11 | -     | -                       |      |
|                      | 164 g/d/cow                                  | g/d/cow of RP- | -     | -                       |      |
|                      | 246 g/d/cow                                  | Met)           | -     | +50 (milk true protein) |      |
| Diet                 | RP-Lys (70 g/d/cow)                          | 17.1           | -     | -                       | [40] |
| RPAA                 | RP-His (32 g/d/cow)                          | (containing    | +0.9  | -                       |      |
|                      | RP-Lys, RP-His                               | feather meal)  | -     | -                       |      |
| RPAA                 | RP-Met, RP-Lys (30, 100 g/d/cow)             | 13.6           | -     | -                       | [43] |
|                      | RP-Met, RP-Lys, RP-His (30, 100, 50 g/d/cow) |                | -     | +100                    |      |
| RPAA                 | Slow release urea                            | 14.8           | -     | -                       | [42] |
|                      | + RP-Met (30 g/d/cow)                        |                | -     | -                       |      |

|      |                                               |      |   |      |      |
|------|-----------------------------------------------|------|---|------|------|
|      | + RP-Met, RP-His (30, 50 g/d/cow)             |      | - | +100 |      |
| RPAA | RP-Met (30 g/d/cow)                           | 14.5 | - | -    | [41] |
|      | RP-Lys (130 g/d/cow)                          |      | - | -    |      |
|      | RP-His (120 g/d/cow)                          |      | - | -    |      |
|      | RP-Met, RP-Lys, RP-His (30, 130, 120 g/d/cow) |      | - | +100 |      |

<sup>1</sup>Arg = arginine; His = histidine; Ile = isoleucine; Leu = leucine; Lys = lysine; Met = methionine; Phe = phenylalanine; Thr = threonine; Trp = tryptophan; Val = valine; BCAA = branched-chain amino acids.

<sup>2</sup>Dietary CP = dietary crude protein.

<sup>3</sup>Milk true protein = milk protein  $\times$  0.94.

<sup>3</sup>RPAA = rumen-protected amino acids.
